# Supplementary material for: 2002–2022: 20 years of e-waste regulation in the European Union and the worldwide trends in legislation and innovation technologies for a circular economy
Source: Royal Society of Chemistry journal article supplement (doi:10.1039/d4su00548a), 2024-11-06
Supplement: d4su00548a1.pdf [file d4su00548a1.pdf]

## Supplementary Material

for

### **2002-2022: 20 years of e-waste regulation in the European Union and the Worldwide trends in legislation and innovation technologies for circular economy.**

A. Serpe<sup>1,2\*</sup>, D. Purchase<sup>3\*</sup>, L. Bisschop<sup>4</sup>, D. Chatterjee<sup>5</sup>, G. De Gioannis<sup>1,2</sup>, H. Garelick<sup>3</sup>, A. Kumar<sup>6</sup>, W.J.G.M. Peijnenburg<sup>7,8</sup>, V. M. I. Piro<sup>1</sup>, M. Cera<sup>1</sup>, Y. Shevah<sup>9</sup>, S. Verbeek.<sup>4</sup>

<sup>1</sup>Department of Civil and Environmental Engineering and Architecture (DICAAR), University of Cagliari, and INSTM unit, Cagliari, Italy

<sup>2</sup>National Research Council of Italy, Institute of Environmental Geology and Geoengineering (CNR-IGAG), Cagliari, Italy

<sup>3</sup>Faculty of Science and Technology, Middlesex University, London, United Kingdom

<sup>4</sup>Erasmus University Rotterdam, Rotterdam, Netherlands

<sup>5</sup>University of Kalyani, Kalyani, India

<sup>6</sup>School of Chemistry, University of St. Andrews, United Kingdom

<sup>7</sup>National Institute for Public Health and the Environment, Center for Safety of Substances and Products, Bilthoven, Netherlands

<sup>8</sup>University of Leiden, Center for Environmental Sciences, Leiden, Netherlands

<sup>9</sup>TAHAL Consulting Eng., Ltd., Tel Aviv, Israel.

Content:

Sect. S1. Industrial technologies and out-puts.

Table S1. PV technologies approaching the market

Figure S1. Multilayer structure and composition for a Si-technology-based photovoltaic panel

Table S2. Average mechanical pre-treatment output from industrial plants by e-waste category in Italy in 2016

Sect. S2. Trends in research and innovation products concerning e-waste valorization

Table S3. Trends in research and innovation products concerning e-waste valorization

Table S4. Publications by country/territory

Table S5. Patent's statistics

Table S6. Results on Google web search engine (data sourcing on 29/01/24).

References

S1. Industrial technologies and out-puts.

Table S1. Average mechanical pre-treatment output from industrial plants by e-waste category in Italy in 2016.<sup>1,2</sup>

| Output mechanical pre-treatment plant | Cold and climate (R1) | Large appliances (R2) | Electronic devices (R3) | Small appliances (R4) | Light sources (R5) |
|---------------------------------------|-----------------------|-----------------------|-------------------------|-----------------------|--------------------|
| Power supplies                        | -                     | -                     | -                       | 0.4%                  | -                  |
| Battery                               | -                     | -                     | -                       | 0.1%                  | -                  |
| Lead-acid batteries                   | -                     | -                     | -                       | 0.5%                  | -                  |
| Mixed Cables                          | 0.5%                  | 0.6%                  | 1.8%                    | 2.8%                  | -                  |
| Cement                                | -                     | 5.0%                  | -                       | -                     | -                  |
| Components                            | -                     | -                     | -                       | 0.8%                  | -                  |
| Compressors                           | 13.4%                 | -                     | -                       | -                     | -                  |
| Phosphorus                            | -                     | -                     | 0.5%                    | -                     | -                  |
| Copper yokes                          | -                     | -                     | 2.7%                    | -                     | -                  |
| HDDs and other drives                 | -                     | -                     | -                       | 1.2%                  | -                  |
| Wood                                  | -                     | 0.3%                  | 1.5%                    | 0.8%                  | -                  |
| Quenched and tempered material        | 0.2%                  | 73.1%                 | 0.0%                    | 33.9%                 | -                  |
| Ferrous                               | 49.9%                 | 14.3%                 | 14.5%                   | 28.3%                 | 1.0%               |
| Non-ferrous metals                    | 4.4%                  | -                     | 0.4%                    | 2.7%                  | 3.0%               |
| Engines                               | 0.1%                  | 2.1%                  | 0.2%                    | 6.5%                  | -                  |
| Packaging                             | -                     | -                     | -                       | 0.1%                  | 3.0%               |
| Plastics                              | 16.1%                 | 1.1%                  | 15.0%                   | 15.4%                 | 10.0%              |
| BFR Plastics                          | -                     | -                     | -                       | 2.1%                  | -                  |
| Shredder residues                     | 1.1%                  | 3.0%                  | 1.0%                    | 1.5%                  | -                  |
| Hazardous waste                       | 0.7%                  | 0.1%                  | 0.6%                    | 1.7%                  | 2.0%               |
| Residual waste                        | -                     | -                     | 0.4%                    | -                     | -                  |
| PCBs                                  | -                     | -                     | 8.2%                    | 0.9%                  | -                  |
| High-level PCBs                       | -                     | -                     | -                       | 0.1%                  | -                  |
| Low-level PCBs                        | -                     | -                     | 1.8%                    | 0.1%                  | -                  |
| Polyurethane foam                     | 12.6%                 | -                     | -                       | -                     | -                  |
| Toner                                 | -                     | -                     | -                       | -                     | -                  |
| Mixed CRT glass                       | -                     | -                     | 21.2%                   | -                     | -                  |
| Front glass                           | -                     | -                     | 30.0%                   | -                     | -                  |
| Non-CRT glass                         | 0.8%                  | 0.5%                  | -                       | -                     | 81.0%              |
| <b>Grand total</b>                    | <b>100.0%</b>         | <b>100.0%</b>         | <b>100.0%</b>           | <b>100.0%</b>         | <b>100.0%</b>      |

Table S2. PV technologies approaching the market.

| PV technology                    | Brief description                                                                                                                                                                                                                                             |
|----------------------------------|---------------------------------------------------------------------------------------------------------------------------------------------------------------------------------------------------------------------------------------------------------------|
| <i>HIT solar cells</i>           | <i>Heterojunction with Intrinsic Thin Layer</i> technology combines amorphous silicon and crystalline silicon to achieve high efficiency and better performance in high-temperature conditions.                                                               |
| <i>Multijunction solar cells</i> | Typically used in <i>Concentrated Photovoltaic</i> (CPV) systems and space applications. They consist of multiple semiconductor materials stacked on top of each other to capture different parts of the solar spectrum, thus achieving very high efficiency. |

|                               |                                                                                                                                                                                                            |
|-------------------------------|------------------------------------------------------------------------------------------------------------------------------------------------------------------------------------------------------------|
| <i>Tandem solar cells</i>     | Tandem solar cells stack multiple layers of solar cell materials with varying bandgaps to capture a wider range of the solar spectrum and improve efficiency.                                              |
| <i>OPV solar cells</i>        | <i>Organic Photovoltaics</i> use organic materials to convert sunlight into electricity. They are lightweight and flexible but generally have lower efficiency than traditional PV technologies.           |
| <i>Perovskite solar cells</i> | Emerging technology known for the potential to achieve high efficiency at a lower cost than others. Still in the research and development stage, this technology hold promises for future PV applications. |

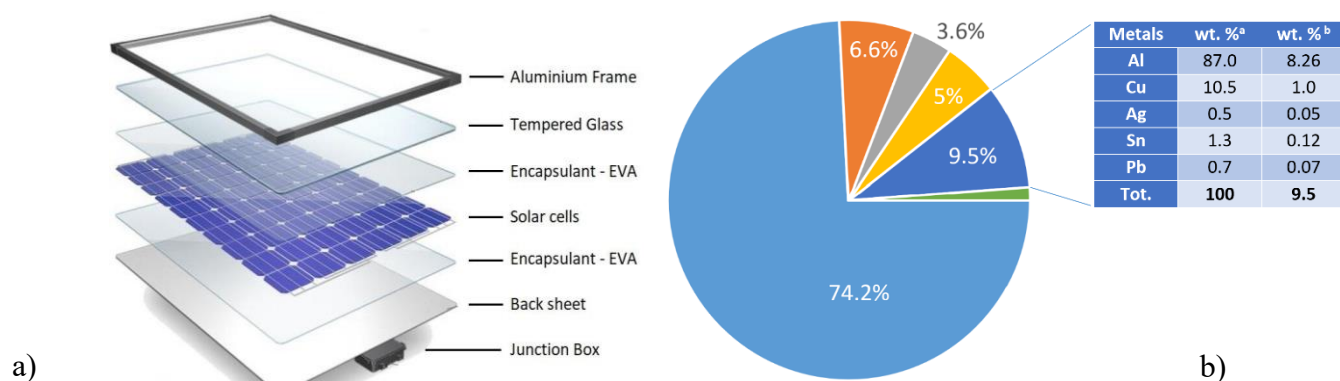

Figure S1. a) Typical multilayer structure configuration for a Si-technology-based photovoltaic panel and b) its composition. ● Glass, ● EVA, ● Tedlar, ● Si, ● Metals, ● Other. <sup>a</sup> Metal fraction composition; <sup>b</sup> Percentage concerning the whole PVP. Adapted from <sup>3</sup>.

S2. Trends in research and innovation products concerning e-waste valorization

In this section the distribution of publications and patents by year, subject, and geography related to *urban mining*, *ecodesign*, and *e-waste*, is detailed. The study covers data spanning from 2002 until 2022 and exploited the Scopus database<sup>4</sup> for publications and Orbit database<sup>5</sup> for patents.

Table S3. Trends in research and innovation products concerning e-waste valorization (data sourcing on 29/01/24).

| Topic                 | Query                                | Trend of publications (n.) over time                                                                                                                                                                                                                                                                                                                                                                                                                                                                                                                                                                                                                                                                                                                                                                                                                                                                                                          | Rate of papers by subject area |                        |      |   |      |   |      |   |      |    |      |    |      |    |      |    |      |    |      |    |      |    |      |    |      |     |      |     |      |     |      |     |      |     |      |     |      |     |      |     |                                                                                                                                                                                                                                                                                                                                                                                                                                                                                                                                                                                                                                                                                        |              |            |                       |       |             |       |       |       |        |      |           |      |                 |      |                      |      |                    |      |                    |      |
|-----------------------|--------------------------------------|-----------------------------------------------------------------------------------------------------------------------------------------------------------------------------------------------------------------------------------------------------------------------------------------------------------------------------------------------------------------------------------------------------------------------------------------------------------------------------------------------------------------------------------------------------------------------------------------------------------------------------------------------------------------------------------------------------------------------------------------------------------------------------------------------------------------------------------------------------------------------------------------------------------------------------------------------|--------------------------------|------------------------|------|---|------|---|------|---|------|----|------|----|------|----|------|----|------|----|------|----|------|----|------|----|------|-----|------|-----|------|-----|------|-----|------|-----|------|-----|------|-----|------|-----|----------------------------------------------------------------------------------------------------------------------------------------------------------------------------------------------------------------------------------------------------------------------------------------------------------------------------------------------------------------------------------------------------------------------------------------------------------------------------------------------------------------------------------------------------------------------------------------------------------------------------------------------------------------------------------------|--------------|------------|-----------------------|-------|-------------|-------|-------|-------|--------|------|-----------|------|-----------------|------|----------------------|------|--------------------|------|--------------------|------|
| Urban mining          | “Urban mining“<br>OR<br>“Urban mine“ | 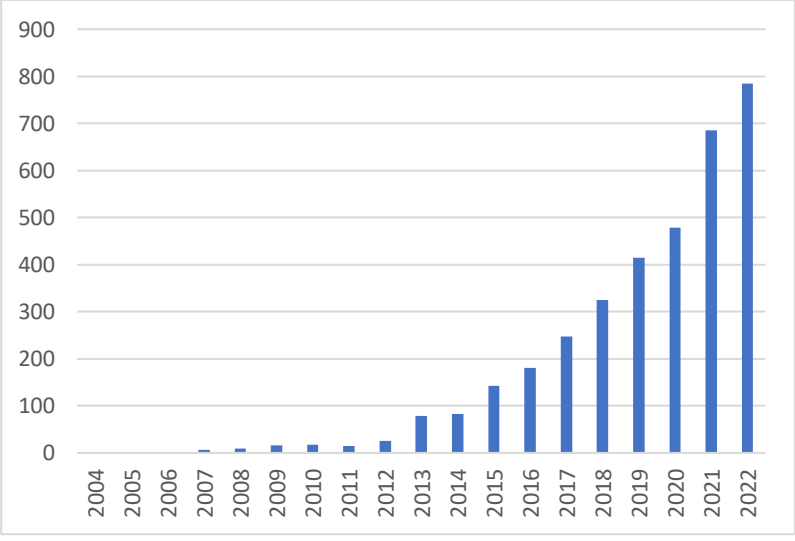 <table border="1"> <caption>Trend of publications (n.) over time</caption> <thead> <tr> <th>Year</th> <th>Number of Publications</th> </tr> </thead> <tbody> <tr><td>2004</td><td>0</td></tr> <tr><td>2005</td><td>0</td></tr> <tr><td>2006</td><td>0</td></tr> <tr><td>2007</td><td>10</td></tr> <tr><td>2008</td><td>15</td></tr> <tr><td>2009</td><td>20</td></tr> <tr><td>2010</td><td>25</td></tr> <tr><td>2011</td><td>30</td></tr> <tr><td>2012</td><td>35</td></tr> <tr><td>2013</td><td>80</td></tr> <tr><td>2014</td><td>90</td></tr> <tr><td>2015</td><td>140</td></tr> <tr><td>2016</td><td>180</td></tr> <tr><td>2017</td><td>250</td></tr> <tr><td>2018</td><td>330</td></tr> <tr><td>2019</td><td>420</td></tr> <tr><td>2020</td><td>480</td></tr> <tr><td>2021</td><td>680</td></tr> <tr><td>2022</td><td>780</td></tr> </tbody> </table> | Year                           | Number of Publications | 2004 | 0 | 2005 | 0 | 2006 | 0 | 2007 | 10 | 2008 | 15 | 2009 | 20 | 2010 | 25 | 2011 | 30 | 2012 | 35 | 2013 | 80 | 2014 | 90 | 2015 | 140 | 2016 | 180 | 2017 | 250 | 2018 | 330 | 2019 | 420 | 2020 | 480 | 2021 | 680 | 2022 | 780 |  <table border="1"> <caption>Rate of papers by subject area</caption> <thead> <tr> <th>Subject Area</th> <th>Percentage</th> </tr> </thead> <tbody> <tr><td>Environmental Science</td><td>24.8%</td></tr> <tr><td>Engineering</td><td>14.5%</td></tr> <tr><td>Other</td><td>12.9%</td></tr> <tr><td>Energy</td><td>8.4%</td></tr> <tr><td>Chemistry</td><td>8.1%</td></tr> <tr><td>Social Sciences</td><td>5.7%</td></tr> <tr><td>Business, Management</td><td>4.7%</td></tr> <tr><td>Economics, Econ...</td><td>3.8%</td></tr> <tr><td>Earth and Plane...</td><td>3.8%</td></tr> </tbody> </table> | Subject Area | Percentage | Environmental Science | 24.8% | Engineering | 14.5% | Other | 12.9% | Energy | 8.4% | Chemistry | 8.1% | Social Sciences | 5.7% | Business, Management | 4.7% | Economics, Econ... | 3.8% | Earth and Plane... | 3.8% |
| Year                  | Number of Publications               |                                                                                                                                                                                                                                                                                                                                                                                                                                                                                                                                                                                                                                                                                                                                                                                                                                                                                                                                               |                                |                        |      |   |      |   |      |   |      |    |      |    |      |    |      |    |      |    |      |    |      |    |      |    |      |     |      |     |      |     |      |     |      |     |      |     |      |     |      |     |                                                                                                                                                                                                                                                                                                                                                                                                                                                                                                                                                                                                                                                                                        |              |            |                       |       |             |       |       |       |        |      |           |      |                 |      |                      |      |                    |      |                    |      |
| 2004                  | 0                                    |                                                                                                                                                                                                                                                                                                                                                                                                                                                                                                                                                                                                                                                                                                                                                                                                                                                                                                                                               |                                |                        |      |   |      |   |      |   |      |    |      |    |      |    |      |    |      |    |      |    |      |    |      |    |      |     |      |     |      |     |      |     |      |     |      |     |      |     |      |     |                                                                                                                                                                                                                                                                                                                                                                                                                                                                                                                                                                                                                                                                                        |              |            |                       |       |             |       |       |       |        |      |           |      |                 |      |                      |      |                    |      |                    |      |
| 2005                  | 0                                    |                                                                                                                                                                                                                                                                                                                                                                                                                                                                                                                                                                                                                                                                                                                                                                                                                                                                                                                                               |                                |                        |      |   |      |   |      |   |      |    |      |    |      |    |      |    |      |    |      |    |      |    |      |    |      |     |      |     |      |     |      |     |      |     |      |     |      |     |      |     |                                                                                                                                                                                                                                                                                                                                                                                                                                                                                                                                                                                                                                                                                        |              |            |                       |       |             |       |       |       |        |      |           |      |                 |      |                      |      |                    |      |                    |      |
| 2006                  | 0                                    |                                                                                                                                                                                                                                                                                                                                                                                                                                                                                                                                                                                                                                                                                                                                                                                                                                                                                                                                               |                                |                        |      |   |      |   |      |   |      |    |      |    |      |    |      |    |      |    |      |    |      |    |      |    |      |     |      |     |      |     |      |     |      |     |      |     |      |     |      |     |                                                                                                                                                                                                                                                                                                                                                                                                                                                                                                                                                                                                                                                                                        |              |            |                       |       |             |       |       |       |        |      |           |      |                 |      |                      |      |                    |      |                    |      |
| 2007                  | 10                                   |                                                                                                                                                                                                                                                                                                                                                                                                                                                                                                                                                                                                                                                                                                                                                                                                                                                                                                                                               |                                |                        |      |   |      |   |      |   |      |    |      |    |      |    |      |    |      |    |      |    |      |    |      |    |      |     |      |     |      |     |      |     |      |     |      |     |      |     |      |     |                                                                                                                                                                                                                                                                                                                                                                                                                                                                                                                                                                                                                                                                                        |              |            |                       |       |             |       |       |       |        |      |           |      |                 |      |                      |      |                    |      |                    |      |
| 2008                  | 15                                   |                                                                                                                                                                                                                                                                                                                                                                                                                                                                                                                                                                                                                                                                                                                                                                                                                                                                                                                                               |                                |                        |      |   |      |   |      |   |      |    |      |    |      |    |      |    |      |    |      |    |      |    |      |    |      |     |      |     |      |     |      |     |      |     |      |     |      |     |      |     |                                                                                                                                                                                                                                                                                                                                                                                                                                                                                                                                                                                                                                                                                        |              |            |                       |       |             |       |       |       |        |      |           |      |                 |      |                      |      |                    |      |                    |      |
| 2009                  | 20                                   |                                                                                                                                                                                                                                                                                                                                                                                                                                                                                                                                                                                                                                                                                                                                                                                                                                                                                                                                               |                                |                        |      |   |      |   |      |   |      |    |      |    |      |    |      |    |      |    |      |    |      |    |      |    |      |     |      |     |      |     |      |     |      |     |      |     |      |     |      |     |                                                                                                                                                                                                                                                                                                                                                                                                                                                                                                                                                                                                                                                                                        |              |            |                       |       |             |       |       |       |        |      |           |      |                 |      |                      |      |                    |      |                    |      |
| 2010                  | 25                                   |                                                                                                                                                                                                                                                                                                                                                                                                                                                                                                                                                                                                                                                                                                                                                                                                                                                                                                                                               |                                |                        |      |   |      |   |      |   |      |    |      |    |      |    |      |    |      |    |      |    |      |    |      |    |      |     |      |     |      |     |      |     |      |     |      |     |      |     |      |     |                                                                                                                                                                                                                                                                                                                                                                                                                                                                                                                                                                                                                                                                                        |              |            |                       |       |             |       |       |       |        |      |           |      |                 |      |                      |      |                    |      |                    |      |
| 2011                  | 30                                   |                                                                                                                                                                                                                                                                                                                                                                                                                                                                                                                                                                                                                                                                                                                                                                                                                                                                                                                                               |                                |                        |      |   |      |   |      |   |      |    |      |    |      |    |      |    |      |    |      |    |      |    |      |    |      |     |      |     |      |     |      |     |      |     |      |     |      |     |      |     |                                                                                                                                                                                                                                                                                                                                                                                                                                                                                                                                                                                                                                                                                        |              |            |                       |       |             |       |       |       |        |      |           |      |                 |      |                      |      |                    |      |                    |      |
| 2012                  | 35                                   |                                                                                                                                                                                                                                                                                                                                                                                                                                                                                                                                                                                                                                                                                                                                                                                                                                                                                                                                               |                                |                        |      |   |      |   |      |   |      |    |      |    |      |    |      |    |      |    |      |    |      |    |      |    |      |     |      |     |      |     |      |     |      |     |      |     |      |     |      |     |                                                                                                                                                                                                                                                                                                                                                                                                                                                                                                                                                                                                                                                                                        |              |            |                       |       |             |       |       |       |        |      |           |      |                 |      |                      |      |                    |      |                    |      |
| 2013                  | 80                                   |                                                                                                                                                                                                                                                                                                                                                                                                                                                                                                                                                                                                                                                                                                                                                                                                                                                                                                                                               |                                |                        |      |   |      |   |      |   |      |    |      |    |      |    |      |    |      |    |      |    |      |    |      |    |      |     |      |     |      |     |      |     |      |     |      |     |      |     |      |     |                                                                                                                                                                                                                                                                                                                                                                                                                                                                                                                                                                                                                                                                                        |              |            |                       |       |             |       |       |       |        |      |           |      |                 |      |                      |      |                    |      |                    |      |
| 2014                  | 90                                   |                                                                                                                                                                                                                                                                                                                                                                                                                                                                                                                                                                                                                                                                                                                                                                                                                                                                                                                                               |                                |                        |      |   |      |   |      |   |      |    |      |    |      |    |      |    |      |    |      |    |      |    |      |    |      |     |      |     |      |     |      |     |      |     |      |     |      |     |      |     |                                                                                                                                                                                                                                                                                                                                                                                                                                                                                                                                                                                                                                                                                        |              |            |                       |       |             |       |       |       |        |      |           |      |                 |      |                      |      |                    |      |                    |      |
| 2015                  | 140                                  |                                                                                                                                                                                                                                                                                                                                                                                                                                                                                                                                                                                                                                                                                                                                                                                                                                                                                                                                               |                                |                        |      |   |      |   |      |   |      |    |      |    |      |    |      |    |      |    |      |    |      |    |      |    |      |     |      |     |      |     |      |     |      |     |      |     |      |     |      |     |                                                                                                                                                                                                                                                                                                                                                                                                                                                                                                                                                                                                                                                                                        |              |            |                       |       |             |       |       |       |        |      |           |      |                 |      |                      |      |                    |      |                    |      |
| 2016                  | 180                                  |                                                                                                                                                                                                                                                                                                                                                                                                                                                                                                                                                                                                                                                                                                                                                                                                                                                                                                                                               |                                |                        |      |   |      |   |      |   |      |    |      |    |      |    |      |    |      |    |      |    |      |    |      |    |      |     |      |     |      |     |      |     |      |     |      |     |      |     |      |     |                                                                                                                                                                                                                                                                                                                                                                                                                                                                                                                                                                                                                                                                                        |              |            |                       |       |             |       |       |       |        |      |           |      |                 |      |                      |      |                    |      |                    |      |
| 2017                  | 250                                  |                                                                                                                                                                                                                                                                                                                                                                                                                                                                                                                                                                                                                                                                                                                                                                                                                                                                                                                                               |                                |                        |      |   |      |   |      |   |      |    |      |    |      |    |      |    |      |    |      |    |      |    |      |    |      |     |      |     |      |     |      |     |      |     |      |     |      |     |      |     |                                                                                                                                                                                                                                                                                                                                                                                                                                                                                                                                                                                                                                                                                        |              |            |                       |       |             |       |       |       |        |      |           |      |                 |      |                      |      |                    |      |                    |      |
| 2018                  | 330                                  |                                                                                                                                                                                                                                                                                                                                                                                                                                                                                                                                                                                                                                                                                                                                                                                                                                                                                                                                               |                                |                        |      |   |      |   |      |   |      |    |      |    |      |    |      |    |      |    |      |    |      |    |      |    |      |     |      |     |      |     |      |     |      |     |      |     |      |     |      |     |                                                                                                                                                                                                                                                                                                                                                                                                                                                                                                                                                                                                                                                                                        |              |            |                       |       |             |       |       |       |        |      |           |      |                 |      |                      |      |                    |      |                    |      |
| 2019                  | 420                                  |                                                                                                                                                                                                                                                                                                                                                                                                                                                                                                                                                                                                                                                                                                                                                                                                                                                                                                                                               |                                |                        |      |   |      |   |      |   |      |    |      |    |      |    |      |    |      |    |      |    |      |    |      |    |      |     |      |     |      |     |      |     |      |     |      |     |      |     |      |     |                                                                                                                                                                                                                                                                                                                                                                                                                                                                                                                                                                                                                                                                                        |              |            |                       |       |             |       |       |       |        |      |           |      |                 |      |                      |      |                    |      |                    |      |
| 2020                  | 480                                  |                                                                                                                                                                                                                                                                                                                                                                                                                                                                                                                                                                                                                                                                                                                                                                                                                                                                                                                                               |                                |                        |      |   |      |   |      |   |      |    |      |    |      |    |      |    |      |    |      |    |      |    |      |    |      |     |      |     |      |     |      |     |      |     |      |     |      |     |      |     |                                                                                                                                                                                                                                                                                                                                                                                                                                                                                                                                                                                                                                                                                        |              |            |                       |       |             |       |       |       |        |      |           |      |                 |      |                      |      |                    |      |                    |      |
| 2021                  | 680                                  |                                                                                                                                                                                                                                                                                                                                                                                                                                                                                                                                                                                                                                                                                                                                                                                                                                                                                                                                               |                                |                        |      |   |      |   |      |   |      |    |      |    |      |    |      |    |      |    |      |    |      |    |      |    |      |     |      |     |      |     |      |     |      |     |      |     |      |     |      |     |                                                                                                                                                                                                                                                                                                                                                                                                                                                                                                                                                                                                                                                                                        |              |            |                       |       |             |       |       |       |        |      |           |      |                 |      |                      |      |                    |      |                    |      |
| 2022                  | 780                                  |                                                                                                                                                                                                                                                                                                                                                                                                                                                                                                                                                                                                                                                                                                                                                                                                                                                                                                                                               |                                |                        |      |   |      |   |      |   |      |    |      |    |      |    |      |    |      |    |      |    |      |    |      |    |      |     |      |     |      |     |      |     |      |     |      |     |      |     |      |     |                                                                                                                                                                                                                                                                                                                                                                                                                                                                                                                                                                                                                                                                                        |              |            |                       |       |             |       |       |       |        |      |           |      |                 |      |                      |      |                    |      |                    |      |
| Subject Area          | Percentage                           |                                                                                                                                                                                                                                                                                                                                                                                                                                                                                                                                                                                                                                                                                                                                                                                                                                                                                                                                               |                                |                        |      |   |      |   |      |   |      |    |      |    |      |    |      |    |      |    |      |    |      |    |      |    |      |     |      |     |      |     |      |     |      |     |      |     |      |     |      |     |                                                                                                                                                                                                                                                                                                                                                                                                                                                                                                                                                                                                                                                                                        |              |            |                       |       |             |       |       |       |        |      |           |      |                 |      |                      |      |                    |      |                    |      |
| Environmental Science | 24.8%                                |                                                                                                                                                                                                                                                                                                                                                                                                                                                                                                                                                                                                                                                                                                                                                                                                                                                                                                                                               |                                |                        |      |   |      |   |      |   |      |    |      |    |      |    |      |    |      |    |      |    |      |    |      |    |      |     |      |     |      |     |      |     |      |     |      |     |      |     |      |     |                                                                                                                                                                                                                                                                                                                                                                                                                                                                                                                                                                                                                                                                                        |              |            |                       |       |             |       |       |       |        |      |           |      |                 |      |                      |      |                    |      |                    |      |
| Engineering           | 14.5%                                |                                                                                                                                                                                                                                                                                                                                                                                                                                                                                                                                                                                                                                                                                                                                                                                                                                                                                                                                               |                                |                        |      |   |      |   |      |   |      |    |      |    |      |    |      |    |      |    |      |    |      |    |      |    |      |     |      |     |      |     |      |     |      |     |      |     |      |     |      |     |                                                                                                                                                                                                                                                                                                                                                                                                                                                                                                                                                                                                                                                                                        |              |            |                       |       |             |       |       |       |        |      |           |      |                 |      |                      |      |                    |      |                    |      |
| Other                 | 12.9%                                |                                                                                                                                                                                                                                                                                                                                                                                                                                                                                                                                                                                                                                                                                                                                                                                                                                                                                                                                               |                                |                        |      |   |      |   |      |   |      |    |      |    |      |    |      |    |      |    |      |    |      |    |      |    |      |     |      |     |      |     |      |     |      |     |      |     |      |     |      |     |                                                                                                                                                                                                                                                                                                                                                                                                                                                                                                                                                                                                                                                                                        |              |            |                       |       |             |       |       |       |        |      |           |      |                 |      |                      |      |                    |      |                    |      |
| Energy                | 8.4%                                 |                                                                                                                                                                                                                                                                                                                                                                                                                                                                                                                                                                                                                                                                                                                                                                                                                                                                                                                                               |                                |                        |      |   |      |   |      |   |      |    |      |    |      |    |      |    |      |    |      |    |      |    |      |    |      |     |      |     |      |     |      |     |      |     |      |     |      |     |      |     |                                                                                                                                                                                                                                                                                                                                                                                                                                                                                                                                                                                                                                                                                        |              |            |                       |       |             |       |       |       |        |      |           |      |                 |      |                      |      |                    |      |                    |      |
| Chemistry             | 8.1%                                 |                                                                                                                                                                                                                                                                                                                                                                                                                                                                                                                                                                                                                                                                                                                                                                                                                                                                                                                                               |                                |                        |      |   |      |   |      |   |      |    |      |    |      |    |      |    |      |    |      |    |      |    |      |    |      |     |      |     |      |     |      |     |      |     |      |     |      |     |      |     |                                                                                                                                                                                                                                                                                                                                                                                                                                                                                                                                                                                                                                                                                        |              |            |                       |       |             |       |       |       |        |      |           |      |                 |      |                      |      |                    |      |                    |      |
| Social Sciences       | 5.7%                                 |                                                                                                                                                                                                                                                                                                                                                                                                                                                                                                                                                                                                                                                                                                                                                                                                                                                                                                                                               |                                |                        |      |   |      |   |      |   |      |    |      |    |      |    |      |    |      |    |      |    |      |    |      |    |      |     |      |     |      |     |      |     |      |     |      |     |      |     |      |     |                                                                                                                                                                                                                                                                                                                                                                                                                                                                                                                                                                                                                                                                                        |              |            |                       |       |             |       |       |       |        |      |           |      |                 |      |                      |      |                    |      |                    |      |
| Business, Management  | 4.7%                                 |                                                                                                                                                                                                                                                                                                                                                                                                                                                                                                                                                                                                                                                                                                                                                                                                                                                                                                                                               |                                |                        |      |   |      |   |      |   |      |    |      |    |      |    |      |    |      |    |      |    |      |    |      |    |      |     |      |     |      |     |      |     |      |     |      |     |      |     |      |     |                                                                                                                                                                                                                                                                                                                                                                                                                                                                                                                                                                                                                                                                                        |              |            |                       |       |             |       |       |       |        |      |           |      |                 |      |                      |      |                    |      |                    |      |
| Economics, Econ...    | 3.8%                                 |                                                                                                                                                                                                                                                                                                                                                                                                                                                                                                                                                                                                                                                                                                                                                                                                                                                                                                                                               |                                |                        |      |   |      |   |      |   |      |    |      |    |      |    |      |    |      |    |      |    |      |    |      |    |      |     |      |     |      |     |      |     |      |     |      |     |      |     |      |     |                                                                                                                                                                                                                                                                                                                                                                                                                                                                                                                                                                                                                                                                                        |              |            |                       |       |             |       |       |       |        |      |           |      |                 |      |                      |      |                    |      |                    |      |
| Earth and Plane...    | 3.8%                                 |                                                                                                                                                                                                                                                                                                                                                                                                                                                                                                                                                                                                                                                                                                                                                                                                                                                                                                                                               |                                |                        |      |   |      |   |      |   |      |    |      |    |      |    |      |    |      |    |      |    |      |    |      |    |      |     |      |     |      |     |      |     |      |     |      |     |      |     |      |     |                                                                                                                                                                                                                                                                                                                                                                                                                                                                                                                                                                                                                                                                                        |              |            |                       |       |             |       |       |       |        |      |           |      |                 |      |                      |      |                    |      |                    |      |

**E-waste**  
**“Ewaste“**  
**OR**  
**“e-waste“**  
**OR**  
**“WEEE“**  
**OR**  
**“Waste**  
**Electrical**  
**and**  
**Electronic**  
**Equipment“**

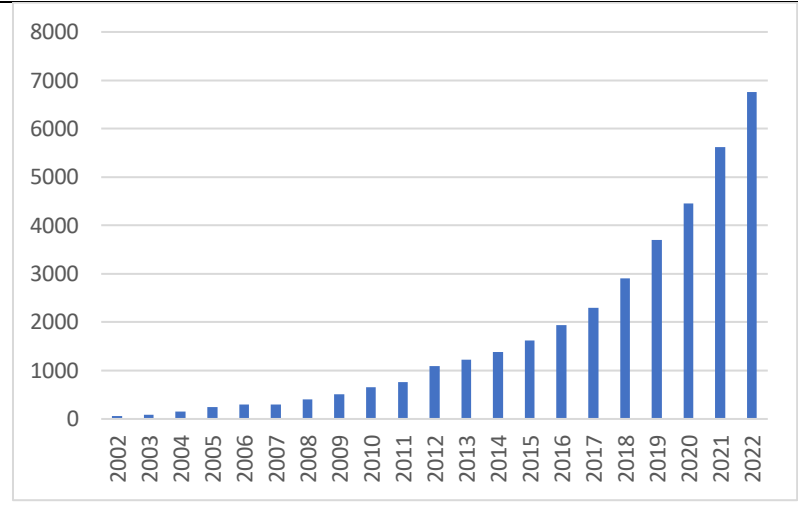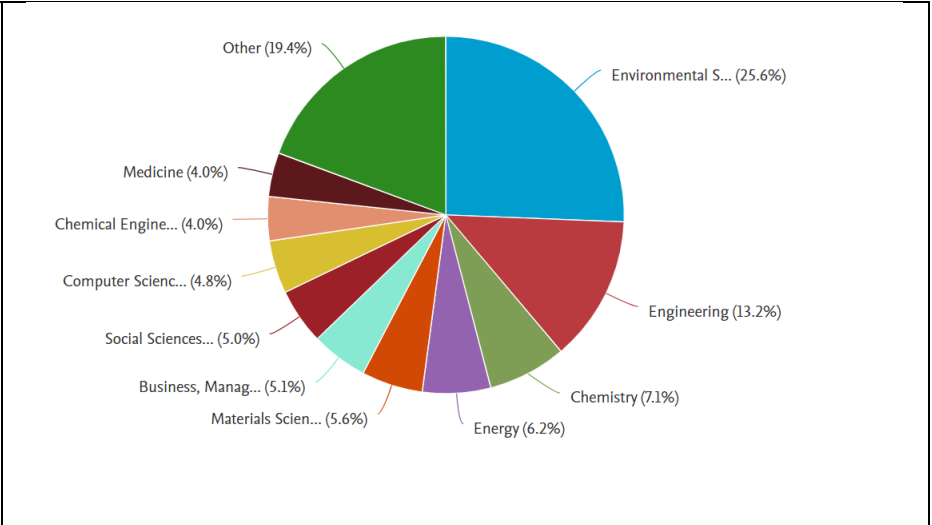

**Ecodesign**  
**“Ecodesign“**  
**OR**  
**“Eco design“**  
**OR**  
**“Eco-design“**

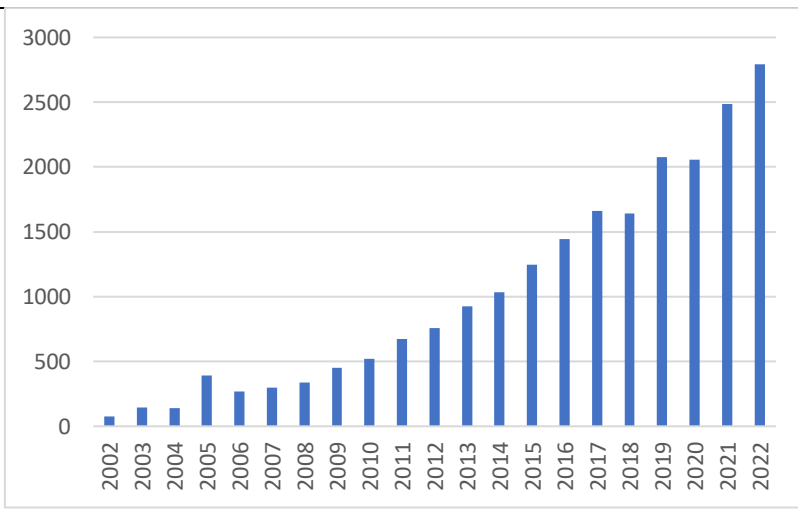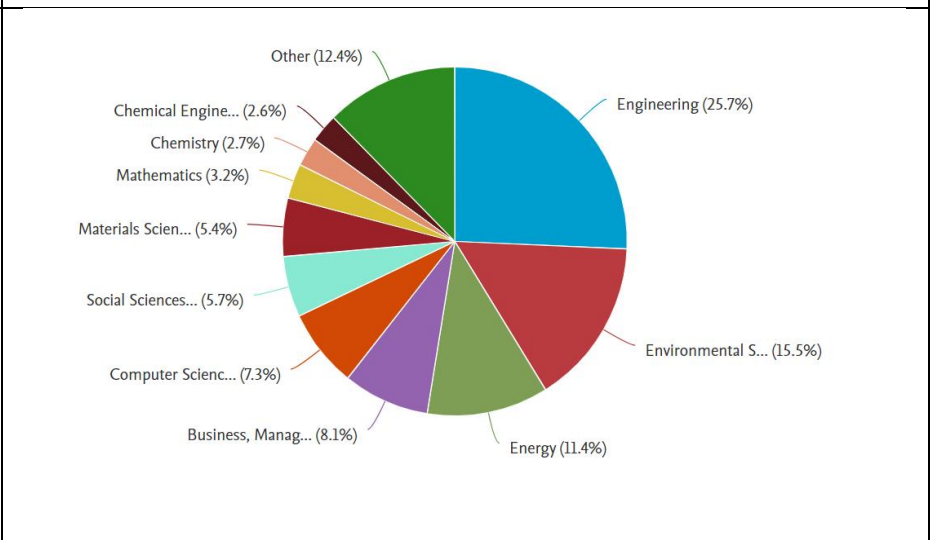

Table S4. Publications by country/territory (data sourcing on 29/01/24)

| <i><b>Territory</b></i> | <i><b>Ecodesign</b></i> | <i><b>Urban Mining</b></i> | <i><b>E-waste</b></i> |
|-------------------------|-------------------------|----------------------------|-----------------------|
| <b>USA</b>              | 2380                    | 297                        | 4399                  |
| <b>CHINA</b>            | 2271                    | 747                        | 11827                 |
| <b>UK</b>               | 1822                    | 179                        | 2239                  |
| <b>FRANCE</b>           | 1439                    | 115                        | 977                   |
| <b>ITALY</b>            | 1830                    | 262                        | 1476                  |
| <b>GERMANY</b>          | 1432                    | 304                        | 1521                  |
| <b>SPAIN</b>            | 1162                    | 97                         | 985                   |
| <b>JAPAN</b>            | 807                     | 302                        | 1164                  |

Table S5. Patent's statistics (data sourcing on 30/01/24).

| topic                                   | Technology investment trend over last 20 years (patents families by first application year) | Patent families by Top technical domain (top 30)                                                                                                                                                                                                                                                                                                                                                                                                                                                                                                                                                                                                                                                                                                                                                                                                                                                                                                                                                                                                                                                                   | Patent families by market coverage |            |                          |        |                      |        |                          |       |                        |       |                            |       |                          |       |                                         |       |                           |       |                            |       |                                    |       |               |       |                             |       |               |       |             |       |                        |       |                     |       |                           |       |  |
|-----------------------------------------|---------------------------------------------------------------------------------------------|--------------------------------------------------------------------------------------------------------------------------------------------------------------------------------------------------------------------------------------------------------------------------------------------------------------------------------------------------------------------------------------------------------------------------------------------------------------------------------------------------------------------------------------------------------------------------------------------------------------------------------------------------------------------------------------------------------------------------------------------------------------------------------------------------------------------------------------------------------------------------------------------------------------------------------------------------------------------------------------------------------------------------------------------------------------------------------------------------------------------|------------------------------------|------------|--------------------------|--------|----------------------|--------|--------------------------|-------|------------------------|-------|----------------------------|-------|--------------------------|-------|-----------------------------------------|-------|---------------------------|-------|----------------------------|-------|------------------------------------|-------|---------------|-------|-----------------------------|-------|---------------|-------|-------------|-------|------------------------|-------|---------------------|-------|---------------------------|-------|--|
| <b>Urban mining</b>                     |                                                                                             | <table border="1"> <caption>Top 30 Technical Domains for Urban Mining</caption> <thead> <tr> <th>Technical Domain</th> <th>Percentage</th> </tr> </thead> <tbody> <tr><td>MATERIALS, METALLURGY</td><td>22.8%</td></tr> <tr><td>CHEMICAL ENGINEERING</td><td>16.5%</td></tr> <tr><td>ENVIRONMENTAL TECHNOLOGY</td><td>15.2%</td></tr> <tr><td>ORGANIC FINE CHEMISTRY</td><td>6.3%</td></tr> <tr><td>CIVIL ENGINEERING</td><td>5.1%</td></tr> <tr><td>OTHER SPECIAL MACHINES</td><td>3.8%</td></tr> <tr><td>THERMAL PROCESSES AND APPARATUS</td><td>3.8%</td></tr> <tr><td>BASIC MATERIALS CHEMISTRY</td><td>3.8%</td></tr> <tr><td>TEXTILE AND PAPER MACHINES</td><td>2.5%</td></tr> <tr><td>MACROMOLECULAR CHEMISTRY, POLYMERS</td><td>2.5%</td></tr> <tr><td>MACHINE TOOLS</td><td>2.5%</td></tr> <tr><td>IT METHODS FOR MANAGEMENT</td><td>2.5%</td></tr> </tbody> </table>                                                                                                                                                                                                                                     | Technical Domain                   | Percentage | MATERIALS, METALLURGY    | 22.8%  | CHEMICAL ENGINEERING | 16.5%  | ENVIRONMENTAL TECHNOLOGY | 15.2% | ORGANIC FINE CHEMISTRY | 6.3%  | CIVIL ENGINEERING          | 5.1%  | OTHER SPECIAL MACHINES   | 3.8%  | THERMAL PROCESSES AND APPARATUS         | 3.8%  | BASIC MATERIALS CHEMISTRY | 3.8%  | TEXTILE AND PAPER MACHINES | 2.5%  | MACROMOLECULAR CHEMISTRY, POLYMERS | 2.5%  | MACHINE TOOLS | 2.5%  | IT METHODS FOR MANAGEMENT   | 2.5%  |               |       |             |       |                        |       |                     |       |                           |       |  |
| Technical Domain                        | Percentage                                                                                  |                                                                                                                                                                                                                                                                                                                                                                                                                                                                                                                                                                                                                                                                                                                                                                                                                                                                                                                                                                                                                                                                                                                    |                                    |            |                          |        |                      |        |                          |       |                        |       |                            |       |                          |       |                                         |       |                           |       |                            |       |                                    |       |               |       |                             |       |               |       |             |       |                        |       |                     |       |                           |       |  |
| MATERIALS, METALLURGY                   | 22.8%                                                                                       |                                                                                                                                                                                                                                                                                                                                                                                                                                                                                                                                                                                                                                                                                                                                                                                                                                                                                                                                                                                                                                                                                                                    |                                    |            |                          |        |                      |        |                          |       |                        |       |                            |       |                          |       |                                         |       |                           |       |                            |       |                                    |       |               |       |                             |       |               |       |             |       |                        |       |                     |       |                           |       |  |
| CHEMICAL ENGINEERING                    | 16.5%                                                                                       |                                                                                                                                                                                                                                                                                                                                                                                                                                                                                                                                                                                                                                                                                                                                                                                                                                                                                                                                                                                                                                                                                                                    |                                    |            |                          |        |                      |        |                          |       |                        |       |                            |       |                          |       |                                         |       |                           |       |                            |       |                                    |       |               |       |                             |       |               |       |             |       |                        |       |                     |       |                           |       |  |
| ENVIRONMENTAL TECHNOLOGY                | 15.2%                                                                                       |                                                                                                                                                                                                                                                                                                                                                                                                                                                                                                                                                                                                                                                                                                                                                                                                                                                                                                                                                                                                                                                                                                                    |                                    |            |                          |        |                      |        |                          |       |                        |       |                            |       |                          |       |                                         |       |                           |       |                            |       |                                    |       |               |       |                             |       |               |       |             |       |                        |       |                     |       |                           |       |  |
| ORGANIC FINE CHEMISTRY                  | 6.3%                                                                                        |                                                                                                                                                                                                                                                                                                                                                                                                                                                                                                                                                                                                                                                                                                                                                                                                                                                                                                                                                                                                                                                                                                                    |                                    |            |                          |        |                      |        |                          |       |                        |       |                            |       |                          |       |                                         |       |                           |       |                            |       |                                    |       |               |       |                             |       |               |       |             |       |                        |       |                     |       |                           |       |  |
| CIVIL ENGINEERING                       | 5.1%                                                                                        |                                                                                                                                                                                                                                                                                                                                                                                                                                                                                                                                                                                                                                                                                                                                                                                                                                                                                                                                                                                                                                                                                                                    |                                    |            |                          |        |                      |        |                          |       |                        |       |                            |       |                          |       |                                         |       |                           |       |                            |       |                                    |       |               |       |                             |       |               |       |             |       |                        |       |                     |       |                           |       |  |
| OTHER SPECIAL MACHINES                  | 3.8%                                                                                        |                                                                                                                                                                                                                                                                                                                                                                                                                                                                                                                                                                                                                                                                                                                                                                                                                                                                                                                                                                                                                                                                                                                    |                                    |            |                          |        |                      |        |                          |       |                        |       |                            |       |                          |       |                                         |       |                           |       |                            |       |                                    |       |               |       |                             |       |               |       |             |       |                        |       |                     |       |                           |       |  |
| THERMAL PROCESSES AND APPARATUS         | 3.8%                                                                                        |                                                                                                                                                                                                                                                                                                                                                                                                                                                                                                                                                                                                                                                                                                                                                                                                                                                                                                                                                                                                                                                                                                                    |                                    |            |                          |        |                      |        |                          |       |                        |       |                            |       |                          |       |                                         |       |                           |       |                            |       |                                    |       |               |       |                             |       |               |       |             |       |                        |       |                     |       |                           |       |  |
| BASIC MATERIALS CHEMISTRY               | 3.8%                                                                                        |                                                                                                                                                                                                                                                                                                                                                                                                                                                                                                                                                                                                                                                                                                                                                                                                                                                                                                                                                                                                                                                                                                                    |                                    |            |                          |        |                      |        |                          |       |                        |       |                            |       |                          |       |                                         |       |                           |       |                            |       |                                    |       |               |       |                             |       |               |       |             |       |                        |       |                     |       |                           |       |  |
| TEXTILE AND PAPER MACHINES              | 2.5%                                                                                        |                                                                                                                                                                                                                                                                                                                                                                                                                                                                                                                                                                                                                                                                                                                                                                                                                                                                                                                                                                                                                                                                                                                    |                                    |            |                          |        |                      |        |                          |       |                        |       |                            |       |                          |       |                                         |       |                           |       |                            |       |                                    |       |               |       |                             |       |               |       |             |       |                        |       |                     |       |                           |       |  |
| MACROMOLECULAR CHEMISTRY, POLYMERS      | 2.5%                                                                                        |                                                                                                                                                                                                                                                                                                                                                                                                                                                                                                                                                                                                                                                                                                                                                                                                                                                                                                                                                                                                                                                                                                                    |                                    |            |                          |        |                      |        |                          |       |                        |       |                            |       |                          |       |                                         |       |                           |       |                            |       |                                    |       |               |       |                             |       |               |       |             |       |                        |       |                     |       |                           |       |  |
| MACHINE TOOLS                           | 2.5%                                                                                        |                                                                                                                                                                                                                                                                                                                                                                                                                                                                                                                                                                                                                                                                                                                                                                                                                                                                                                                                                                                                                                                                                                                    |                                    |            |                          |        |                      |        |                          |       |                        |       |                            |       |                          |       |                                         |       |                           |       |                            |       |                                    |       |               |       |                             |       |               |       |             |       |                        |       |                     |       |                           |       |  |
| IT METHODS FOR MANAGEMENT               | 2.5%                                                                                        |                                                                                                                                                                                                                                                                                                                                                                                                                                                                                                                                                                                                                                                                                                                                                                                                                                                                                                                                                                                                                                                                                                                    |                                    |            |                          |        |                      |        |                          |       |                        |       |                            |       |                          |       |                                         |       |                           |       |                            |       |                                    |       |               |       |                             |       |               |       |             |       |                        |       |                     |       |                           |       |  |
| <b>E-waste</b>                          |                                                                                             | <table border="1"> <caption>Top 30 Technical Domains for E-waste</caption> <thead> <tr> <th>Technical Domain</th> <th>Percentage</th> </tr> </thead> <tbody> <tr><td>ENVIRONMENTAL TECHNOLOGY</td><td>15.66%</td></tr> <tr><td>CHEMICAL ENGINEERING</td><td>11.09%</td></tr> <tr><td>MATERIALS, METALLURGY</td><td>7.24%</td></tr> <tr><td>OTHER SPECIAL MACHINES</td><td>5.73%</td></tr> <tr><td>TEXTILE AND PAPER MACHINES</td><td>3.47%</td></tr> <tr><td>ENGINES, PUMPS, TURBINES</td><td>3.44%</td></tr> <tr><td>ELECTRICAL MACHINERY, APPARATUS, ENERGY</td><td>3.33%</td></tr> <tr><td>CIVIL ENGINEERING</td><td>3.27%</td></tr> <tr><td>OPTICS</td><td>2.91%</td></tr> <tr><td>MACHINE TOOLS</td><td>2.77%</td></tr> <tr><td>HANDLING</td><td>2.56%</td></tr> <tr><td>SURFACE TECHNOLOGY, COATING</td><td>2.54%</td></tr> <tr><td>BIOTECHNOLOGY</td><td>2.22%</td></tr> <tr><td>MEASUREMENT</td><td>2.09%</td></tr> <tr><td>ORGANIC FINE CHEMISTRY</td><td>2.09%</td></tr> <tr><td>COMPUTER TECHNOLOGY</td><td>1.96%</td></tr> <tr><td>IT METHODS FOR MANAGEMENT</td><td>1.84%</td></tr> </tbody> </table> | Technical Domain                   | Percentage | ENVIRONMENTAL TECHNOLOGY | 15.66% | CHEMICAL ENGINEERING | 11.09% | MATERIALS, METALLURGY    | 7.24% | OTHER SPECIAL MACHINES | 5.73% | TEXTILE AND PAPER MACHINES | 3.47% | ENGINES, PUMPS, TURBINES | 3.44% | ELECTRICAL MACHINERY, APPARATUS, ENERGY | 3.33% | CIVIL ENGINEERING         | 3.27% | OPTICS                     | 2.91% | MACHINE TOOLS                      | 2.77% | HANDLING      | 2.56% | SURFACE TECHNOLOGY, COATING | 2.54% | BIOTECHNOLOGY | 2.22% | MEASUREMENT | 2.09% | ORGANIC FINE CHEMISTRY | 2.09% | COMPUTER TECHNOLOGY | 1.96% | IT METHODS FOR MANAGEMENT | 1.84% |  |
| Technical Domain                        | Percentage                                                                                  |                                                                                                                                                                                                                                                                                                                                                                                                                                                                                                                                                                                                                                                                                                                                                                                                                                                                                                                                                                                                                                                                                                                    |                                    |            |                          |        |                      |        |                          |       |                        |       |                            |       |                          |       |                                         |       |                           |       |                            |       |                                    |       |               |       |                             |       |               |       |             |       |                        |       |                     |       |                           |       |  |
| ENVIRONMENTAL TECHNOLOGY                | 15.66%                                                                                      |                                                                                                                                                                                                                                                                                                                                                                                                                                                                                                                                                                                                                                                                                                                                                                                                                                                                                                                                                                                                                                                                                                                    |                                    |            |                          |        |                      |        |                          |       |                        |       |                            |       |                          |       |                                         |       |                           |       |                            |       |                                    |       |               |       |                             |       |               |       |             |       |                        |       |                     |       |                           |       |  |
| CHEMICAL ENGINEERING                    | 11.09%                                                                                      |                                                                                                                                                                                                                                                                                                                                                                                                                                                                                                                                                                                                                                                                                                                                                                                                                                                                                                                                                                                                                                                                                                                    |                                    |            |                          |        |                      |        |                          |       |                        |       |                            |       |                          |       |                                         |       |                           |       |                            |       |                                    |       |               |       |                             |       |               |       |             |       |                        |       |                     |       |                           |       |  |
| MATERIALS, METALLURGY                   | 7.24%                                                                                       |                                                                                                                                                                                                                                                                                                                                                                                                                                                                                                                                                                                                                                                                                                                                                                                                                                                                                                                                                                                                                                                                                                                    |                                    |            |                          |        |                      |        |                          |       |                        |       |                            |       |                          |       |                                         |       |                           |       |                            |       |                                    |       |               |       |                             |       |               |       |             |       |                        |       |                     |       |                           |       |  |
| OTHER SPECIAL MACHINES                  | 5.73%                                                                                       |                                                                                                                                                                                                                                                                                                                                                                                                                                                                                                                                                                                                                                                                                                                                                                                                                                                                                                                                                                                                                                                                                                                    |                                    |            |                          |        |                      |        |                          |       |                        |       |                            |       |                          |       |                                         |       |                           |       |                            |       |                                    |       |               |       |                             |       |               |       |             |       |                        |       |                     |       |                           |       |  |
| TEXTILE AND PAPER MACHINES              | 3.47%                                                                                       |                                                                                                                                                                                                                                                                                                                                                                                                                                                                                                                                                                                                                                                                                                                                                                                                                                                                                                                                                                                                                                                                                                                    |                                    |            |                          |        |                      |        |                          |       |                        |       |                            |       |                          |       |                                         |       |                           |       |                            |       |                                    |       |               |       |                             |       |               |       |             |       |                        |       |                     |       |                           |       |  |
| ENGINES, PUMPS, TURBINES                | 3.44%                                                                                       |                                                                                                                                                                                                                                                                                                                                                                                                                                                                                                                                                                                                                                                                                                                                                                                                                                                                                                                                                                                                                                                                                                                    |                                    |            |                          |        |                      |        |                          |       |                        |       |                            |       |                          |       |                                         |       |                           |       |                            |       |                                    |       |               |       |                             |       |               |       |             |       |                        |       |                     |       |                           |       |  |
| ELECTRICAL MACHINERY, APPARATUS, ENERGY | 3.33%                                                                                       |                                                                                                                                                                                                                                                                                                                                                                                                                                                                                                                                                                                                                                                                                                                                                                                                                                                                                                                                                                                                                                                                                                                    |                                    |            |                          |        |                      |        |                          |       |                        |       |                            |       |                          |       |                                         |       |                           |       |                            |       |                                    |       |               |       |                             |       |               |       |             |       |                        |       |                     |       |                           |       |  |
| CIVIL ENGINEERING                       | 3.27%                                                                                       |                                                                                                                                                                                                                                                                                                                                                                                                                                                                                                                                                                                                                                                                                                                                                                                                                                                                                                                                                                                                                                                                                                                    |                                    |            |                          |        |                      |        |                          |       |                        |       |                            |       |                          |       |                                         |       |                           |       |                            |       |                                    |       |               |       |                             |       |               |       |             |       |                        |       |                     |       |                           |       |  |
| OPTICS                                  | 2.91%                                                                                       |                                                                                                                                                                                                                                                                                                                                                                                                                                                                                                                                                                                                                                                                                                                                                                                                                                                                                                                                                                                                                                                                                                                    |                                    |            |                          |        |                      |        |                          |       |                        |       |                            |       |                          |       |                                         |       |                           |       |                            |       |                                    |       |               |       |                             |       |               |       |             |       |                        |       |                     |       |                           |       |  |
| MACHINE TOOLS                           | 2.77%                                                                                       |                                                                                                                                                                                                                                                                                                                                                                                                                                                                                                                                                                                                                                                                                                                                                                                                                                                                                                                                                                                                                                                                                                                    |                                    |            |                          |        |                      |        |                          |       |                        |       |                            |       |                          |       |                                         |       |                           |       |                            |       |                                    |       |               |       |                             |       |               |       |             |       |                        |       |                     |       |                           |       |  |
| HANDLING                                | 2.56%                                                                                       |                                                                                                                                                                                                                                                                                                                                                                                                                                                                                                                                                                                                                                                                                                                                                                                                                                                                                                                                                                                                                                                                                                                    |                                    |            |                          |        |                      |        |                          |       |                        |       |                            |       |                          |       |                                         |       |                           |       |                            |       |                                    |       |               |       |                             |       |               |       |             |       |                        |       |                     |       |                           |       |  |
| SURFACE TECHNOLOGY, COATING             | 2.54%                                                                                       |                                                                                                                                                                                                                                                                                                                                                                                                                                                                                                                                                                                                                                                                                                                                                                                                                                                                                                                                                                                                                                                                                                                    |                                    |            |                          |        |                      |        |                          |       |                        |       |                            |       |                          |       |                                         |       |                           |       |                            |       |                                    |       |               |       |                             |       |               |       |             |       |                        |       |                     |       |                           |       |  |
| BIOTECHNOLOGY                           | 2.22%                                                                                       |                                                                                                                                                                                                                                                                                                                                                                                                                                                                                                                                                                                                                                                                                                                                                                                                                                                                                                                                                                                                                                                                                                                    |                                    |            |                          |        |                      |        |                          |       |                        |       |                            |       |                          |       |                                         |       |                           |       |                            |       |                                    |       |               |       |                             |       |               |       |             |       |                        |       |                     |       |                           |       |  |
| MEASUREMENT                             | 2.09%                                                                                       |                                                                                                                                                                                                                                                                                                                                                                                                                                                                                                                                                                                                                                                                                                                                                                                                                                                                                                                                                                                                                                                                                                                    |                                    |            |                          |        |                      |        |                          |       |                        |       |                            |       |                          |       |                                         |       |                           |       |                            |       |                                    |       |               |       |                             |       |               |       |             |       |                        |       |                     |       |                           |       |  |
| ORGANIC FINE CHEMISTRY                  | 2.09%                                                                                       |                                                                                                                                                                                                                                                                                                                                                                                                                                                                                                                                                                                                                                                                                                                                                                                                                                                                                                                                                                                                                                                                                                                    |                                    |            |                          |        |                      |        |                          |       |                        |       |                            |       |                          |       |                                         |       |                           |       |                            |       |                                    |       |               |       |                             |       |               |       |             |       |                        |       |                     |       |                           |       |  |
| COMPUTER TECHNOLOGY                     | 1.96%                                                                                       |                                                                                                                                                                                                                                                                                                                                                                                                                                                                                                                                                                                                                                                                                                                                                                                                                                                                                                                                                                                                                                                                                                                    |                                    |            |                          |        |                      |        |                          |       |                        |       |                            |       |                          |       |                                         |       |                           |       |                            |       |                                    |       |               |       |                             |       |               |       |             |       |                        |       |                     |       |                           |       |  |
| IT METHODS FOR MANAGEMENT               | 1.84%                                                                                       |                                                                                                                                                                                                                                                                                                                                                                                                                                                                                                                                                                                                                                                                                                                                                                                                                                                                                                                                                                                                                                                                                                                    |                                    |            |                          |        |                      |        |                          |       |                        |       |                            |       |                          |       |                                         |       |                           |       |                            |       |                                    |       |               |       |                             |       |               |       |             |       |                        |       |                     |       |                           |       |  |

# Eco-design

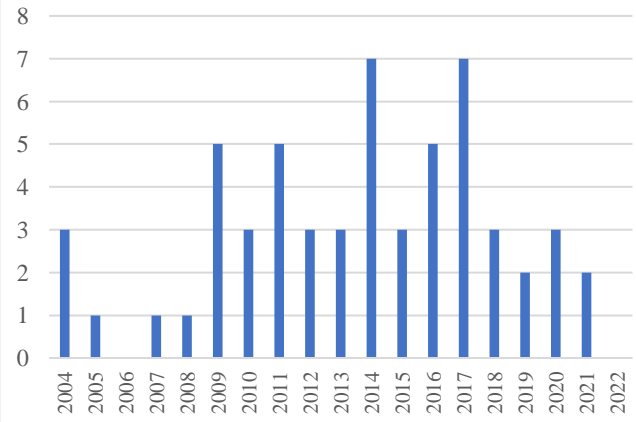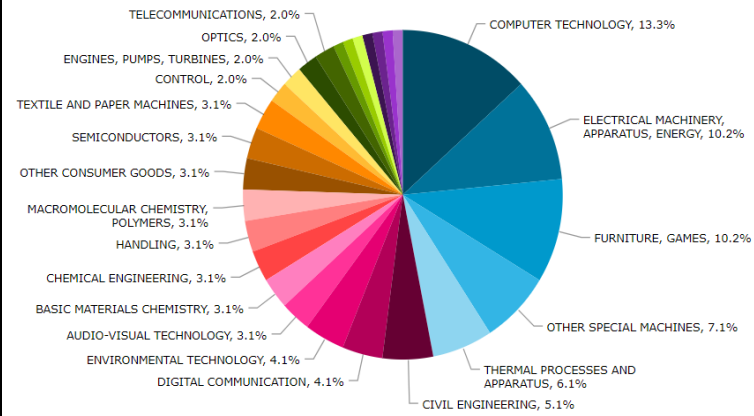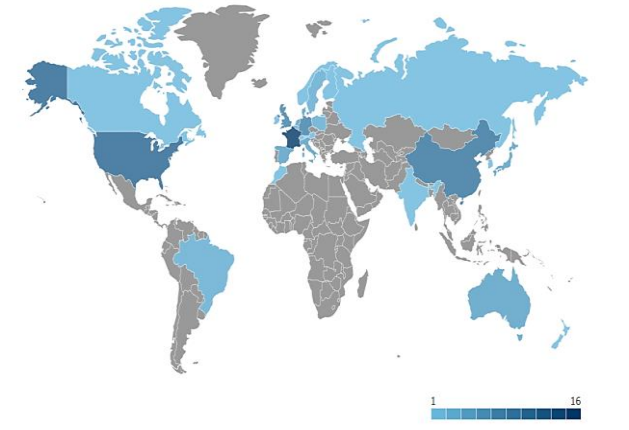



Table S6. Results on Google web search engine (data sourcing on 29/01/24).

| <p><b>Urban Mining</b></p> | <p>millions of outcomes</p> <table border="1"> <thead> <tr> <th>Timeframe</th> <th>millions of outcomes</th> </tr> </thead> <tbody> <tr> <td>2002-2007</td> <td>0,974</td> </tr> <tr> <td>2007-2012</td> <td>5,93</td> </tr> <tr> <td>2012-2017</td> <td>23,1</td> </tr> <tr> <td>2017-2022</td> <td>133</td> </tr> </tbody> </table> <p>Timeframe</p>    | Timeframe | millions of outcomes | 2002-2007 | 0,974  | 2007-2012 | 5,93  | 2012-2017 | 23,1 | 2017-2022 | 133  |
|----------------------------|-----------------------------------------------------------------------------------------------------------------------------------------------------------------------------------------------------------------------------------------------------------------------------------------------------------------------------------------------------------|-----------|----------------------|-----------|--------|-----------|-------|-----------|------|-----------|------|
| Timeframe                  | millions of outcomes                                                                                                                                                                                                                                                                                                                                      |           |                      |           |        |           |       |           |      |           |      |
| 2002-2007                  | 0,974                                                                                                                                                                                                                                                                                                                                                     |           |                      |           |        |           |       |           |      |           |      |
| 2007-2012                  | 5,93                                                                                                                                                                                                                                                                                                                                                      |           |                      |           |        |           |       |           |      |           |      |
| 2012-2017                  | 23,1                                                                                                                                                                                                                                                                                                                                                      |           |                      |           |        |           |       |           |      |           |      |
| 2017-2022                  | 133                                                                                                                                                                                                                                                                                                                                                       |           |                      |           |        |           |       |           |      |           |      |
| <p><b>E-waste</b></p>      | <p>millions of outcomes</p> <table border="1"> <thead> <tr> <th>timeframe</th> <th>millions of outcomes</th> </tr> </thead> <tbody> <tr> <td>2002-2007</td> <td>14,9</td> </tr> <tr> <td>2007-2012</td> <td>67,9</td> </tr> <tr> <td>2012-2017</td> <td>274</td> </tr> <tr> <td>2017-2022</td> <td>541</td> </tr> </tbody> </table> <p>timeframe</p>      | timeframe | millions of outcomes | 2002-2007 | 14,9   | 2007-2012 | 67,9  | 2012-2017 | 274  | 2017-2022 | 541  |
| timeframe                  | millions of outcomes                                                                                                                                                                                                                                                                                                                                      |           |                      |           |        |           |       |           |      |           |      |
| 2002-2007                  | 14,9                                                                                                                                                                                                                                                                                                                                                      |           |                      |           |        |           |       |           |      |           |      |
| 2007-2012                  | 67,9                                                                                                                                                                                                                                                                                                                                                      |           |                      |           |        |           |       |           |      |           |      |
| 2012-2017                  | 274                                                                                                                                                                                                                                                                                                                                                       |           |                      |           |        |           |       |           |      |           |      |
| 2017-2022                  | 541                                                                                                                                                                                                                                                                                                                                                       |           |                      |           |        |           |       |           |      |           |      |
| <p><b>Ecodesign</b></p>    | <p>millions of outcomes</p> <table border="1"> <thead> <tr> <th>timeframe</th> <th>millions of outcomes</th> </tr> </thead> <tbody> <tr> <td>2002-2007</td> <td>0,0141</td> </tr> <tr> <td>2007-2012</td> <td>0,053</td> </tr> <tr> <td>2012-2017</td> <td>3,79</td> </tr> <tr> <td>2017-2022</td> <td>14,1</td> </tr> </tbody> </table> <p>timeframe</p> | timeframe | millions of outcomes | 2002-2007 | 0,0141 | 2007-2012 | 0,053 | 2012-2017 | 3,79 | 2017-2022 | 14,1 |
| timeframe                  | millions of outcomes                                                                                                                                                                                                                                                                                                                                      |           |                      |           |        |           |       |           |      |           |      |
| 2002-2007                  | 0,0141                                                                                                                                                                                                                                                                                                                                                    |           |                      |           |        |           |       |           |      |           |      |
| 2007-2012                  | 0,053                                                                                                                                                                                                                                                                                                                                                     |           |                      |           |        |           |       |           |      |           |      |
| 2012-2017                  | 3,79                                                                                                                                                                                                                                                                                                                                                      |           |                      |           |        |           |       |           |      |           |      |
| 2017-2022                  | 14,1                                                                                                                                                                                                                                                                                                                                                      |           |                      |           |        |           |       |           |      |           |      |

### References

1. *Rifiuti da Apparecchiature Elettriche ed Elettroniche*. CdC RAEE | Centro di Coordinamento RAEE. <https://www.cdcrree.it/ae-e-raee/rifiuti-da-apparecchiature-elettriche-ed-elettroniche/> (accessed 2023-12-20).
2. *DECRETO LEGISLATIVO 14 marzo 2014, n. 49 - Normattiva*. <https://www.normattiva.it/uri-res/N2Ls?urn:nir:stato:decreto.legislativo:2014;49> (accessed 2023-12-20).
3. Monier, V.; Hestin, M. *Study on Photovoltaic Panels Supplementing the Impact Assessment for a Recast of the WEEE Directive*; A project under the Framework contract ENV.G.4/FRA/2007/0067; Final report; Bio Intelligence Service Sas: Paris, 2011. <https://ec.europa.eu/environment/pdf/waste/weee/Study%20on%20PVs%20Bio%20final.pdf>.
4. <https://www.scopus.com/search/form.uri?display=basic#basic/>
5. <https://www.orbit.com/>
